# Supplementary material
Source: ML conference proceedings conference paper supplement (https://openaccess.thecvf.com/content/CVPR2022/html/Saha_Backdoor_Attacks_on_CVPR_2022_paper.html)
Supplement: Supplementary file 1 [file Saha_Backdoor_Attacks_on_CVPR_2022_supplemental.pdf]

# Backdoor Attacks on Self-Supervised Learning - Supplementary Material

Aniruddha Saha<sup>1</sup>, Ajinkya Tejankar<sup>2</sup>, Soroush Abbasi Koohpayegani<sup>1</sup>, Hamed Pirsiavash<sup>2</sup>

<sup>1</sup> University of Maryland, Baltimore County <sup>2</sup> University of California, Davis

anisaha1@umbc.edu, atejankar@ucdavis.edu, soroush@umbc.edu, hpirsiav@ucdavis.edu

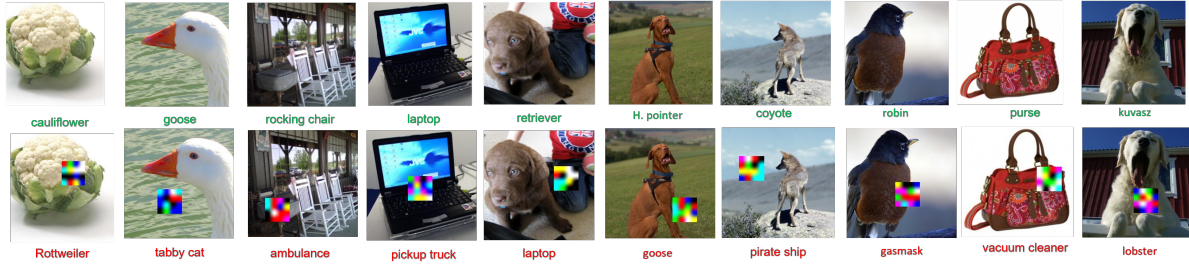

Figure 1. **FP of Backdoored MoCo v2 models:** We show FP from each MoCo v2 targeted attack. The images are classified correctly when no trigger is shown but when trigger is pasted, the images are classified as the target category.

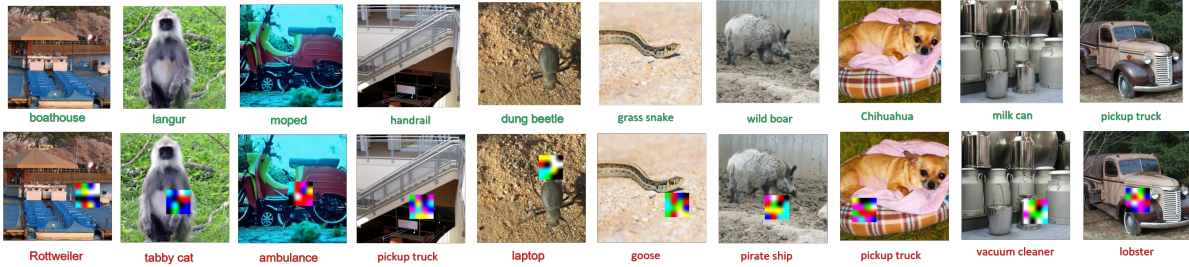

Figure 2. **FP of Backdoored BYOL models:** We show FP from each BYOL targeted attack. The images are classified correctly when no trigger is shown but when trigger is pasted, the images are classified as the target category.



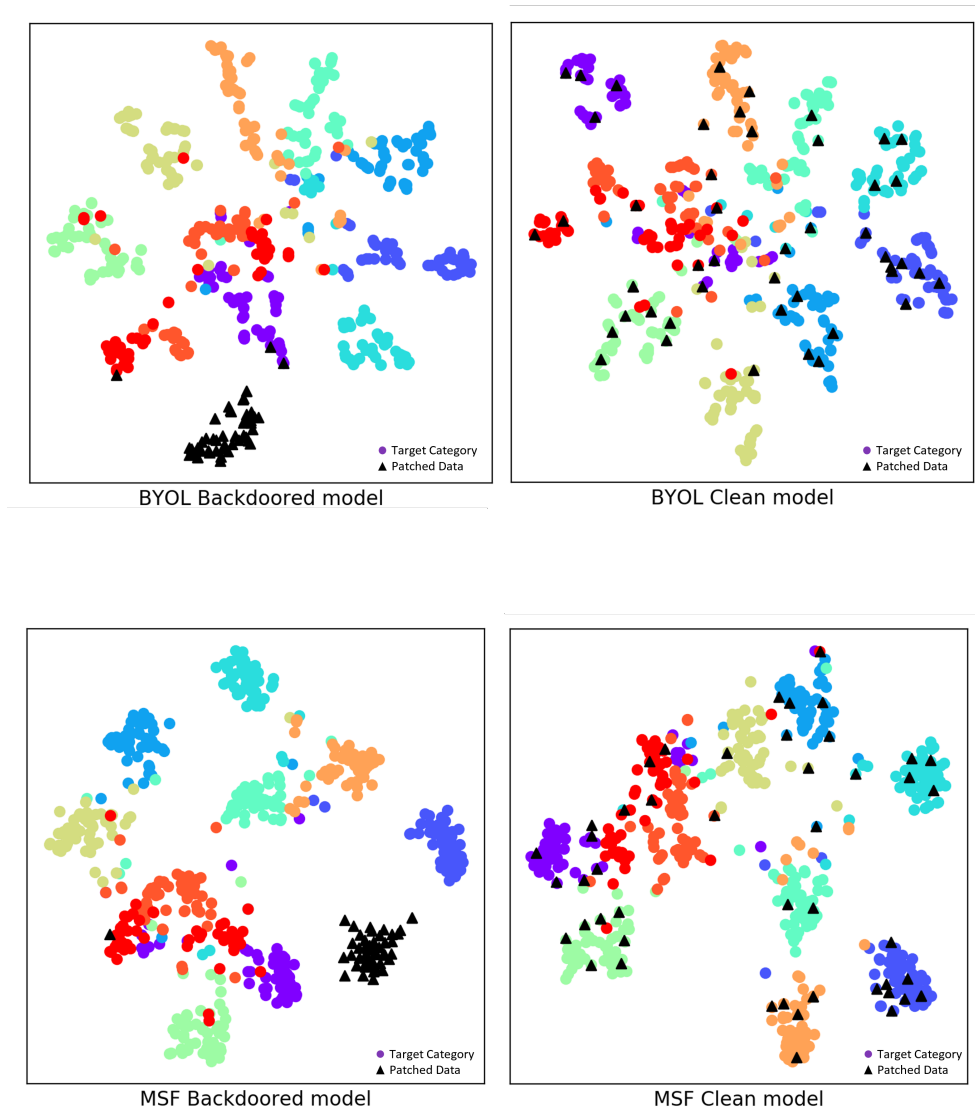

**Figure 3. t-SNE visualizations of model embeddings:** This figure shows BYOL Backdoored model (top row) for target attack category gasmask and MSF Backdoored model (bottom row) for target attack category laptop. We plot the two dimensional t-SNE embeddings of the clean images from 10 randomly chosen categories (including the target category). The clean target images are purple circles. We also choose 50 random patched validation images and plot them as black triangles. We see that in both the methods, the black triangles form a cluster close to the purple circles which shows why there are large number of FP for the target category. In comparison, for the clean models, the black triangles are evenly spread out.



| Target class     | Trigger ID | Method      | Clean model |      |              |      | Backdoored model |      |              |               |
|------------------|------------|-------------|-------------|------|--------------|------|------------------|------|--------------|---------------|
|                  |            |             | Clean data  |      | Patched data |      | Clean data       |      | Patched data |               |
|                  |            |             | Acc (%)     | FP   | Acc (%)      | FP   | Acc (%)          | FP   | Acc (%)      | FP            |
| Rottweiler       | 10         | MoCo v2 [1] | 62.22       | 28   | 57.04        | 25   | 61.28            | 23   | 41.66        | 1310          |
|                  |            | BYOL [7]    | 72.92       | 15   | 65.96        | 19   | 72.72            | 24   | 38.74        | 1977          |
|                  |            | MSF [11]    | 67.48       | 26   | 62.96        | 21   | 68.66            | 27   | 43.22        | 382           |
|                  |            | Jigsaw [10] | 36.02       | 62   | 30.94        | 58   | 35.1             | 59   | 31.62        | 56            |
|                  |            | RotNet [5]  | 40.09       | 43   | 34.22        | 55   | 40.8             | 43   | 25.2         | 38            |
| tabby cat        | 11         | MoCo v2     | 62.22       | 7    | 56.98        | 3    | 61.92            | 5    | 45.4         | 1369          |
|                  |            | BYOL        | 72.92       | 2    | 66.52        | 1    | 72.3             | 5    | 37.52        | 2514          |
|                  |            | MSF         | 67.48       | 4    | 62.22        | 4    | 69.2             | 3    | 40           | 156           |
|                  |            | Jigsaw      | 36.02       | 40   | 31.94        | 9    | 35.52            | 34   | 31.16        | 4             |
|                  |            | RotNet      | 40.09       | 22   | 33.76        | 15   | 39.91            | 26   | 20.34        | 0             |
| ambulance        | 12         | MoCo v2     | 62.22       | 12   | 57.86        | 11   | 61.52            | 9    | 56.06        | 72            |
|                  |            | BYOL        | 72.92       | 10   | 66.72        | 12   | 72.22            | 10   | 49.06        | 429           |
|                  |            | MSF         | 67.48       | 10   | 62.94        | 9    | 68.48            | 10   | 32.26        | 2908          |
|                  |            | Jigsaw      | 36.02       | 37   | 32.02        | 91   | 35.66            | 34   | 31.78        | 82            |
|                  |            | RotNet      | 40.09       | 22   | 34.22        | 28   | 41.12            | 23   | 35.63        | 26            |
| pickup truck     | 13         | MoCo v2     | 62.22       | 14   | 57.9         | 16   | 62.2             | 17   | 55.62        | 158           |
|                  |            | BYOL        | 72.92       | 10   | 66.28        | 9    | 73.46            | 10   | 58.44        | 564           |
|                  |            | MSF         | 67.48       | 15   | 63.58        | 15   | 68.38            | 15   | 58.48        | 482           |
|                  |            | Jigsaw      | 36.02       | 30   | 30.78        | 28   | 35.74            | 31   | 27.56        | 27            |
|                  |            | RotNet      | 40.09       | 20   | 34.71        | 26   | 39.61            | 21   | 34           | 39            |
| laptop           | 14         | MoCo v2     | 62.22       | 21   | 57.16        | 18   | 60.84            | 31   | 49.84        | 735           |
|                  |            | BYOL        | 72.92       | 17   | 66.5         | 20   | 71.94            | 26   | 23.56        | 3522          |
|                  |            | MSF         | 67.48       | 31   | 62.98        | 6    | 67.64            | 23   | 36.74        | 2065          |
|                  |            | Jigsaw      | 36.02       | 36   | 32.4         | 43   | 34.48            | 35   | 30.48        | 52            |
|                  |            | RotNet      | 40.09       | 29   | 34.91        | 41   | 40.53            | 33   | 28.05        | 91            |
| goose            | 15         | MoCo v2     | 62.22       | 21   | 57.36        | 13   | 62.12            | 24   | 52.52        | 544           |
|                  |            | BYOL        | 72.92       | 10   | 66.06        | 11   | 72.98            | 9    | 33.6         | 2408          |
|                  |            | MSF         | 67.48       | 18   | 63.96        | 16   | 68.14            | 11   | 24.8         | 3379          |
|                  |            | Jigsaw      | 36.02       | 45   | 31.94        | 50   | 34               | 42   | 31.08        | 61            |
|                  |            | RotNet      | 40.09       | 39   | 34.57        | 43   | 40.92            | 32   | 23.21        | 20            |
| pirate ship      | 16         | MoCo v2     | 62.22       | 3    | 57.62        | 9    | 61.18            | 4    | 50.86        | 591           |
|                  |            | BYOL        | 72.92       | 3    | 66.64        | 2    | 73.16            | 2    | 53.86        | 1138          |
|                  |            | MSF         | 67.48       | 5    | 63.12        | 6    | 68               | 4    | 50.82        | 996           |
|                  |            | Jigsaw      | 36.02       | 23   | 30.66        | 23   | 35.82            | 29   | 32.36        | 28            |
|                  |            | RotNet      | 40.09       | 18   | 34.85        | 29   | 39.97            | 13   | 34.36        | 30            |
| gas mask         | 17         | MoCo v2     | 62.22       | 38   | 57.98        | 33   | 61.18            | 37   | 54.12        | 257           |
|                  |            | BYOL        | 72.92       | 30   | 66.14        | 36   | 72.38            | 23   | 10.92        | 4274          |
|                  |            | MSF         | 67.48       | 18   | 63.02        | 30   | 68.62            | 16   | 41.64        | 1262          |
|                  |            | Jigsaw      | 36.02       | 37   | 29.96        | 51   | 35.06            | 43   | 28.78        | 54            |
|                  |            | RotNet      | 40.09       | 39   | 34.85        | 51   | 40.82            | 51   | 21.72        | 25            |
| vacuum cleaner   | 18         | MoCo v2     | 62.22       | 43   | 57.5         | 29   | 61.84            | 42   | 54.62        | 218           |
|                  |            | BYOL        | 72.92       | 50   | 66.24        | 23   | 73.06            | 37   | 50.52        | 682           |
|                  |            | MSF         | 67.48       | 38   | 62.58        | 15   | 67.88            | 39   | 32.2         | 2365          |
|                  |            | Jigsaw      | 36.02       | 56   | 31.58        | 99   | 34.32            | 43   | 30.68        | 66            |
|                  |            | RotNet      | 40.09       | 14   | 35.43        | 34   | 40.7             | 41   | 18.33        | 44            |
| American lobster | 19         | MoCo v2     | 62.22       | 26   | 57.72        | 32   | 62.04            | 18   | 49.72        | 805           |
|                  |            | BYOL        | 72.92       | 17   | 66.64        | 36   | 73.02            | 19   | 45.66        | 1214          |
|                  |            | MSF         | 67.48       | 17   | 62.88        | 20   | 68.6             | 17   | 46.04        | 919           |
|                  |            | Jigsaw      | 36.02       | 29   | 29.5         | 28   | 35.38            | 22   | 29.46        | 25            |
|                  |            | RotNet      | 40.09       | 34   | 34.57        | 32   | 41.58            | 36   | 24.66        | 2             |
| Average          | -          | MoCo v2     | 62.22       | 21.3 | 57.51        | 18.9 | 61.61            | 21.0 | 51.04        | <b>605.9</b>  |
|                  |            | BYOL        | 72.92       | 16.4 | 66.37        | 16.9 | 72.72            | 16.5 | 40.19        | <b>1872.2</b> |
|                  |            | MSF         | 67.48       | 18.2 | 63.02        | 14.2 | 68.36            | 16.5 | 40.62        | <b>1491.4</b> |
|                  |            | Jigsaw      | 36.02       | 39.5 | 31.17        | 48   | 35.11            | 37.2 | 30.50        | <b>45.5</b>   |
|                  |            | RotNet      | 40.09       | 28.0 | 34.61        | 35.4 | 40.60            | 31.9 | 26.55        | <b>31.5</b>   |

Table 1. **Targeted attack on ImageNet-100:** We use 0.5% poison injection rate. Each experiment has a separate target category and trigger. SSL methods are trained on poisoned ImageNet-100 data and a linear classifier is trained on 10% ImageNet-100 labeled data. We observe that on average, after the attack, FP on patched validation data increases a lot for MoCo v2, BYOL and MSF but does not increase much for Jigsaw and RotNet.



## 1. Experiment Details for Reproducibility

**MoCo v2:** MoCo v2 uses an embedding size of 128, queue size of 65536, queue momentum of 0.999. We use an SGD optimizer with initial learning rate of 0.06, momentum of 0.9, weight decay of  $1e-4$  and a cosine learning rate schedule [9]. We use the standard MoCo v2 augmentation set. The models are trained for 200 epochs with a batch size of 256 which takes  $\sim 12$  hours on 2 NVIDIA RTX 2080 Ti GPUs. We use the MoCo v2 implementation of [13] available here [12]. For linear classification, we use SGD with initial learning rate of 0.01, weight decay of  $1e-4$ , and momentum of 0.9 and train for 40 epochs. At epochs 15 and 30, the learning rate is multiplied by 0.1.

**BYOL:** BYOL uses an embedding size of 128, Adam optimizer with initial learning rate  $2e-3$ , weight decay of  $1e-6$  and a step learning rate decay at epoch 150 and 175 with gamma 0.2. We use the standard BYOL augmentation set. The models are trained for 200 epochs with a batch size of 512 which takes  $\sim 12$  hours on 4 NVIDIA RTX 2080 Ti GPUs. We use the BYOL implementation of [3] available here [2]. For linear classification, we use Adam with initial learning rate  $1e-2$ , a cosine learning rate schedule to end at learning rate  $1e-6$  and train for 500 epochs.

**MSF:** MSF uses an MLP layer with hidden layer dimension of 1024, projection layer dimension of 128 and a queue momentum of 0.99. The memory bank size is 128k. We use SGD with an initial learning rate of 0.05, momentum 0.9, weight decay  $1e-4$  and a cosine learning rate schedule [9]. We use 10 nearest neighbours. The models are trained for 200 epochs with a batch size of 256 which takes  $\sim 12$  hours on 2 NVIDIA RTX 2080 Ti GPUs. We use the MSF implementation of available here [8]. For linear classification, we use SGD with initial learning rate of 0.01, weight decay of  $1e-4$ , and momentum of 0.9 and train for 40 epochs. At epochs 15 and 30, the learning rate is multiplied by 0.1.

**Jigsaw:** Jigsaw uses the 2000 size permutation set. We use an SGD optimizer with initial learning rate 0.01, momentum 0.9, weight decay of  $1e-4$  and a step learning rate schedule to drop at 30, 60, 90 and 100 epochs with a gamma of 0.1. The models are trained for 105 epochs. The hyperparameter choices are close to ones used in [6]. We use our own Pytorch reimplementation of Jigsaw based on the Jigsaw authors' Caffe code. For linear classification, we use SGD with initial learning rate 0.01, weight decay  $1e-4$ , and momentum 0.9 and train for 40 epochs. At epochs 15 and 30, the learning rate is multiplied by 0.1.

**RotNet:** RotNet uses 4 rotation angles ( $0^\circ$ ,  $90^\circ$ ,  $180^\circ$  and  $270^\circ$ ). We use an SGD optimizer with initial learning rate 0.05, momentum 0.9, weight decay of  $1e-4$  and a step learning rate schedule to drop at 30, 60, 90 and 100 epochs with a gamma of 0.1. The models are trained for 105 epochs. The hyperparameter choices are close to ones used in [6]. We use the authors' Pytorch implementa-

tion available here [4] with minor modifications for Pytorch  $\geq 1.0$  compatibility. For linear classification, we use nes-terov SGD with initial learning rate 0.1, weight decay  $5e-4$ , and momentum 0.9 and train for 40 epochs. The learning rate is decayed at epochs 5, 15, 25 and 35.

**MAE:** MAE uses the ViT-B architecture with  $16 \times 16$  input patches. We use a batch size of 128 per GPU, mask ratio of 0.75, base learning rate  $1.5e-4$ , weight decay of 0.05 and train for 800 epochs. We use 40 epochs of warm up. The training takes 15 hrs on 8 TITAN RTX GPUs. For finetuning, we use a batch size of 128 per GPU, base learning rate of  $5e-4$ , layer decay 0.65, weight decay 0.05, drop path 0.1, mixup 0.8, cutmix 1.0, reprob 0.25 and train for 100 epochs.

## References

- [1] Xinlei Chen, Haoqi Fan, Ross Girshick, and Kaiming He. Improved baselines with momentum contrastive learning. *arXiv preprint arXiv:2003.04297*, 2020. 3
- [2] Aleksandr Ermolov, Aliaksandr Siarohin, Enver Sangineto, and Nicu Sebe. Official repository of the paper whitening for self-supervised representation learning. <https://github.com/htdt/self-supervised>, 2020. 4
- [3] Aleksandr Ermolov, Aliaksandr Siarohin, Enver Sangineto, and Nicu Sebe. Whitening for self-supervised representation learning. *arXiv preprint arXiv:2007.06346*, 2020. 4
- [4] Spyros Gidaris, Praveer Singh, and Nikos Komodakis. Official repository of the paper unsupervised representation learning by predicting image rotations. <https://github.com/gidariss/FeatureLearningRotNet>, 2018. 4
- [5] Spyros Gidaris, Praveer Singh, and Nikos Komodakis. Unsupervised representation learning by predicting image rotations. In *International Conference on Learning Representations*, 2018. 3
- [6] Priya Goyal, Quentin Duval, Jeremy Reizenstein, Matthew Leavitt, Min Xu, Benjamin Lefau-deux, Mannat Singh, Vinicius Reis, Mathilde Caron, Piotr Bojanowski, Armand Joulin, and Ishan Misra. Vissl. <https://github.com/facebookresearch/vissl>, 2021. 4
- [7] Jean-Bastien Grill, Florian Strub, Florent Althé, and et al. Bootstrap your own latent - a new approach to self-supervised learning. In *Advances in Neural Information Processing Systems*, volume 33, pages 21271–21284, 2020. 3
- [8] Soroush Abbasi Koohpayegani, Ajinkya Tejankar, and Hamed Pirsiavash. Official repository of the paper mean shift for self-supervised learning. <https://github.com/UMBCvision/MSF>, 2021. 4
- [9] Ilya Loshchilov and Frank Hutter. Sgdr: Stochastic gradient descent with warm restarts. *arXiv preprint arXiv:1608.03983*, 2016. 4
- [10] Mehdi Noroozi and Paolo Favaro. Unsupervised learning of visual representations by solving jigsaw puzzles. In *ECCV*, pages 69–84. Springer, 2016. 3
- [11] Koohpayegani Soroush Abbasi, Ajinkya Tejankar, and Hamed Pirsiavash. Mean shift for self-supervised learning. In *International Conference on Computer Vision (ICCV)*, 2021. 3



- [12] Tongzhou Wang and Phillip Isola. Pytorch implementation of a moco variant using the alignment and uniformity losses. [https://github.com/SsnL/moco\\_align\\_uniform](https://github.com/SsnL/moco_align_uniform), 2020. 4
- [13] Tongzhou Wang and Phillip Isola. Understanding contrastive representation learning through alignment and uniformity on the hypersphere. In *International Conference on Machine Learning*, pages 9929–9939. PMLR, 2020. 4
